# Supplementary figures and images for: SARS-CoV-2 Spike Pseudoviruses: A Useful Tool to Study Virus Entry and Address Emerging Neutralization Escape Phenotypes
Source: MDPI journal article supplement (doi:10.3390/microorganisms9081744), 2021-08-16

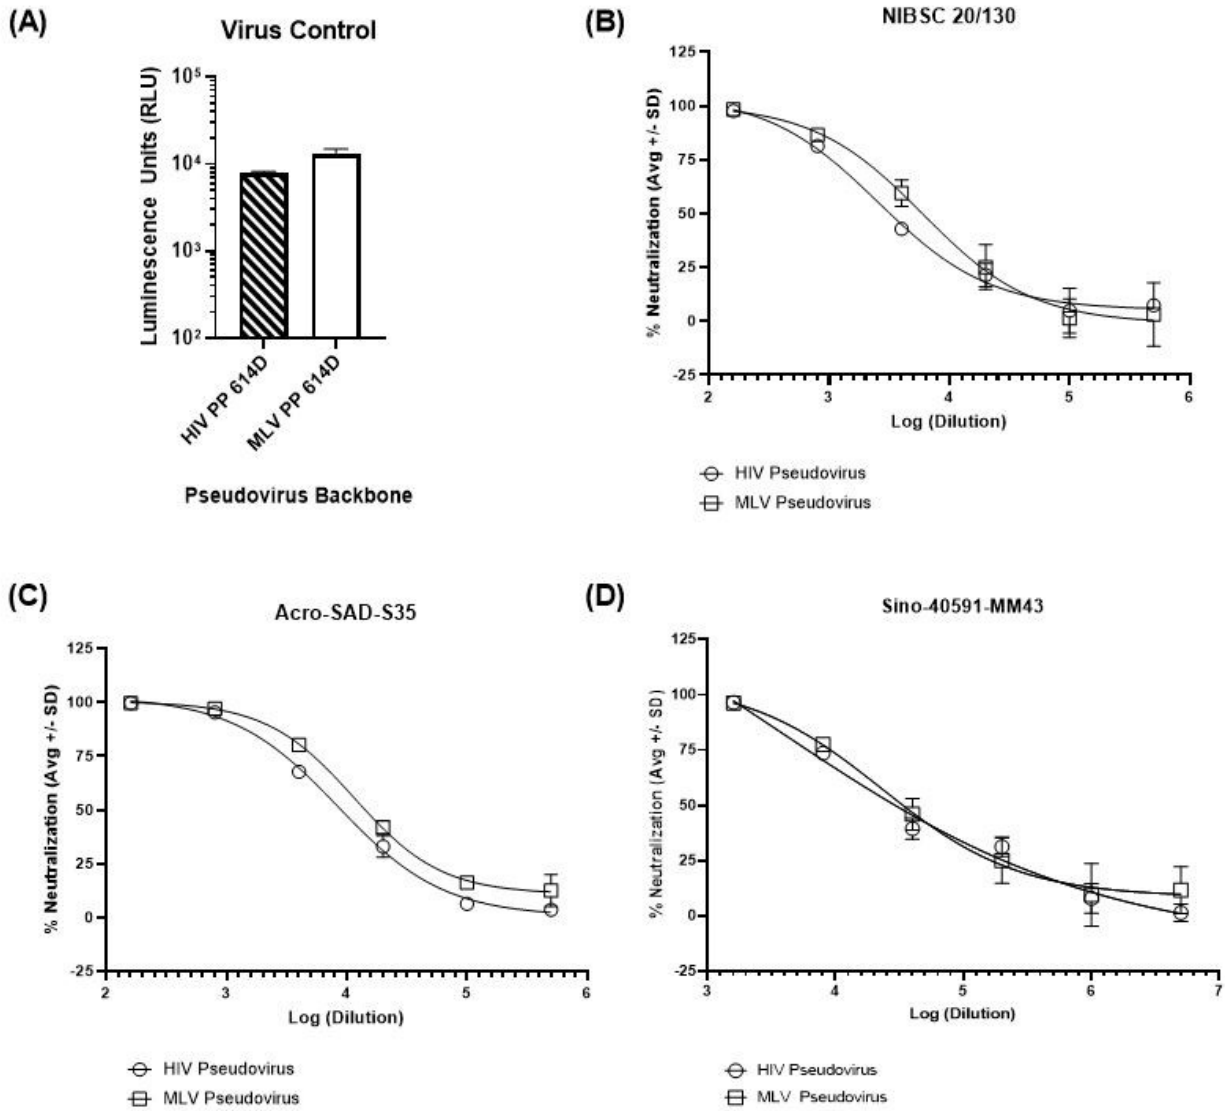

**Figure S1:** Similarity between SARS-CoV-2 614D pseudovirus with HIV backbone and MLV backbone.

Supplement: s1 [file s1]
